# Supplementary material
Source: PubMed Central journal article supplement (PMC6646258)
Supplement: ao8b01476_si_001.pdf [file ao8b01476_si_001.pdf]

An efficient synthesis and *in silico* studies of Benzimidazole hybrid scaffold with quinolinyloxadiazoles skeleton with potential alpha-glucosidase inhibitory, anticoagulant, antiplatelet activity, type-II diabetes mellitus management and treating thrombotic disorders

*Shashidhar Bharadwaj S a, Boja Poojary a\*, Sharath Kumar M. Nandish b, Jayanna Kengaiiah b, Mugaranja P Kirana c, Madan Kumar Shankar d Anupam J Das e, Ananda Kulal c, Devaraja Sannanigaiah b*

<sup>a</sup>*Department of Studies in Chemistry, Mangalore University, Mangalagangothri-574 199, India.*

<sup>b</sup>*Department of Studies and Research in Biochemistry and Centre for Bioscience and Innovation, Tumkur University, Tumkur, 572103, India*

<sup>c</sup>*Department of Biological Sciences, Poornaprajna Institute of Scientific Research, Bengalurud*

<sup>d</sup>PURSE Lab, Mangalore University, Mangalagangothri- 574 199, India.

<sup>e</sup>Department of Biotechnology, School of Chemical and Biological Sciences, REVA University, Kattigenahalli Campus, Bangalore - 64, Karnataka, India.

### Supporting information

**Table S1: Physical properties and structural features of target compounds**

| Compound  | Ar | R                             | Mol. formula                                                  | Mol. weight | M. P. (°C) |
|-----------|----|-------------------------------|---------------------------------------------------------------|-------------|------------|
| <b>5a</b> | -  | CH <sub>3</sub>               | C <sub>10</sub> H <sub>12</sub> N <sub>2</sub> O <sub>4</sub> | 224.08      | 98-100     |
| <b>5b</b> | -  | C <sub>3</sub> H <sub>7</sub> | C <sub>12</sub> H <sub>16</sub> N <sub>2</sub> O <sub>4</sub> | 252.11      | 77-78      |

|           |   |                               |                                                                   |        |         |
|-----------|---|-------------------------------|-------------------------------------------------------------------|--------|---------|
| <b>5c</b> | - | C <sub>4</sub> H <sub>9</sub> | C <sub>13</sub> H <sub>18</sub> N <sub>2</sub> O <sub>4</sub>     | 266.13 | 52-54   |
| <b>6a</b> | - | CH <sub>3</sub>               | C <sub>15</sub> H <sub>13</sub> BrN <sub>2</sub> O <sub>2</sub> S | 363.99 | 160-165 |
| <b>6b</b> | - | C <sub>3</sub> H <sub>7</sub> | C <sub>17</sub> H <sub>17</sub> BrN <sub>2</sub> O <sub>2</sub> S | 392.02 | 120-124 |
| <b>6c</b> | - | C <sub>4</sub> H <sub>9</sub> | C <sub>18</sub> H <sub>19</sub> BrN <sub>2</sub> O <sub>2</sub> S | 406.04 | 95-98   |
| <b>7a</b> | - | CH <sub>3</sub>               | C <sub>13</sub> H <sub>11</sub> BrN <sub>4</sub> OS               | 349.98 | >230    |
| <b>7b</b> | - | C <sub>3</sub> H <sub>7</sub> | C <sub>15</sub> H <sub>15</sub> BrN <sub>4</sub> OS               | 378.01 | 140-144 |
| <b>7c</b> | - | C <sub>4</sub> H <sub>9</sub> | C <sub>16</sub> H <sub>17</sub> BrN <sub>4</sub> OS               | 392.03 | >230    |

|           |                                                   |                               |                                                                                  |        |         |
|-----------|---------------------------------------------------|-------------------------------|----------------------------------------------------------------------------------|--------|---------|
| <b>8a</b> | 3,5-F <sub>2</sub> C <sub>6</sub> H <sub>3</sub>  | CH <sub>3</sub>               | C <sub>29</sub> H <sub>16</sub> BrF <sub>2</sub> N <sub>5</sub> OS               | 599.02 | 214-218 |
| <b>8b</b> | 3,5-F <sub>2</sub> C <sub>6</sub> H <sub>3</sub>  | C <sub>3</sub> H <sub>7</sub> | C <sub>31</sub> H <sub>20</sub> BrF <sub>2</sub> N <sub>5</sub> OS               | 627.05 | 189-193 |
| <b>8c</b> | 3,5-F <sub>2</sub> C <sub>6</sub> H <sub>3</sub>  | C <sub>4</sub> H <sub>9</sub> | C <sub>32</sub> H <sub>22</sub> BrF <sub>2</sub> N <sub>5</sub> O <sub>2</sub> S | 641.07 | 192-194 |
| <b>8d</b> | 2,4-Cl <sub>2</sub> C <sub>6</sub> H <sub>3</sub> | CH <sub>3</sub>               | C <sub>29</sub> H <sub>16</sub> BrCl <sub>2</sub> N <sub>5</sub> OS              | 630.96 | >225    |
| <b>8e</b> | 2,4-Cl <sub>2</sub> C <sub>6</sub> H <sub>3</sub> | C <sub>3</sub> H <sub>7</sub> | C <sub>31</sub> H <sub>20</sub> BrCl <sub>2</sub> N <sub>5</sub> OS              | 658.99 | 172-176 |
| <b>8f</b> | 2,4-Cl <sub>2</sub> C <sub>6</sub> H <sub>3</sub> | C <sub>4</sub> H <sub>9</sub> | C <sub>32</sub> H <sub>20</sub> BrCl <sub>2</sub> N <sub>5</sub> OS              | 673.01 | >225    |

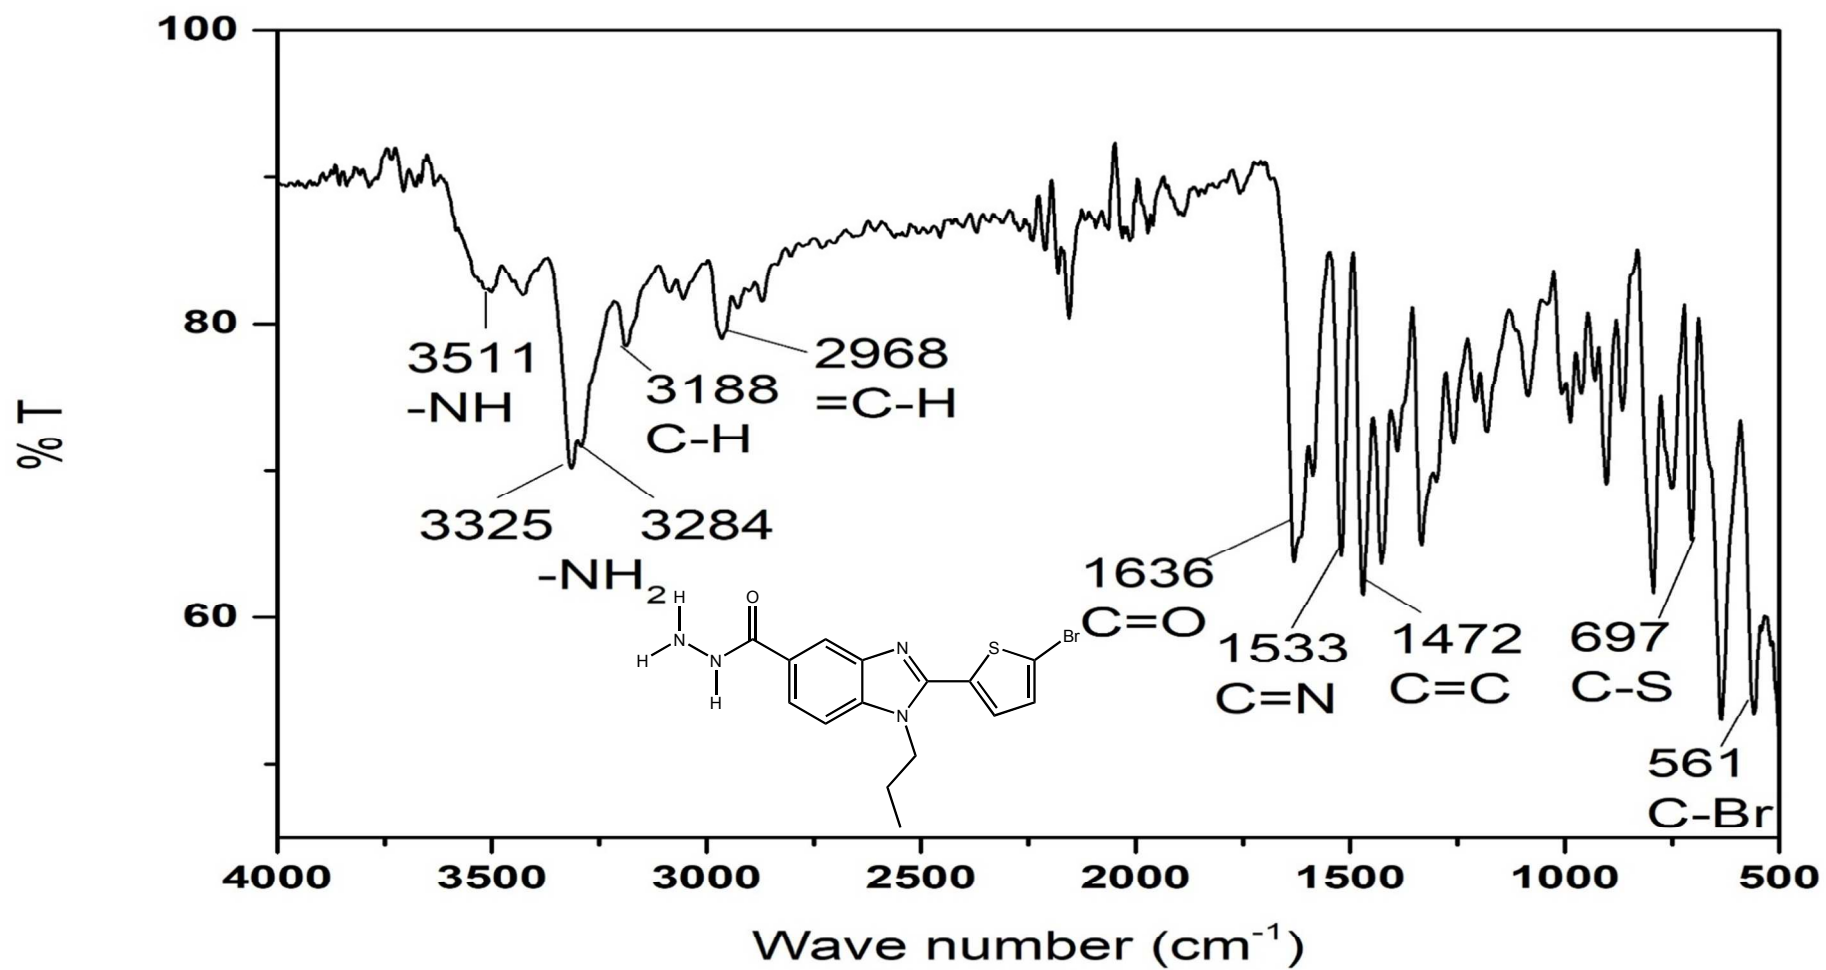

Figure S1: IR spectrum of compound 2-(5-bromothiophen-2-yl)-1-propyl-1H-benzo[d]imidazole-5-carbohydrazide (7b)

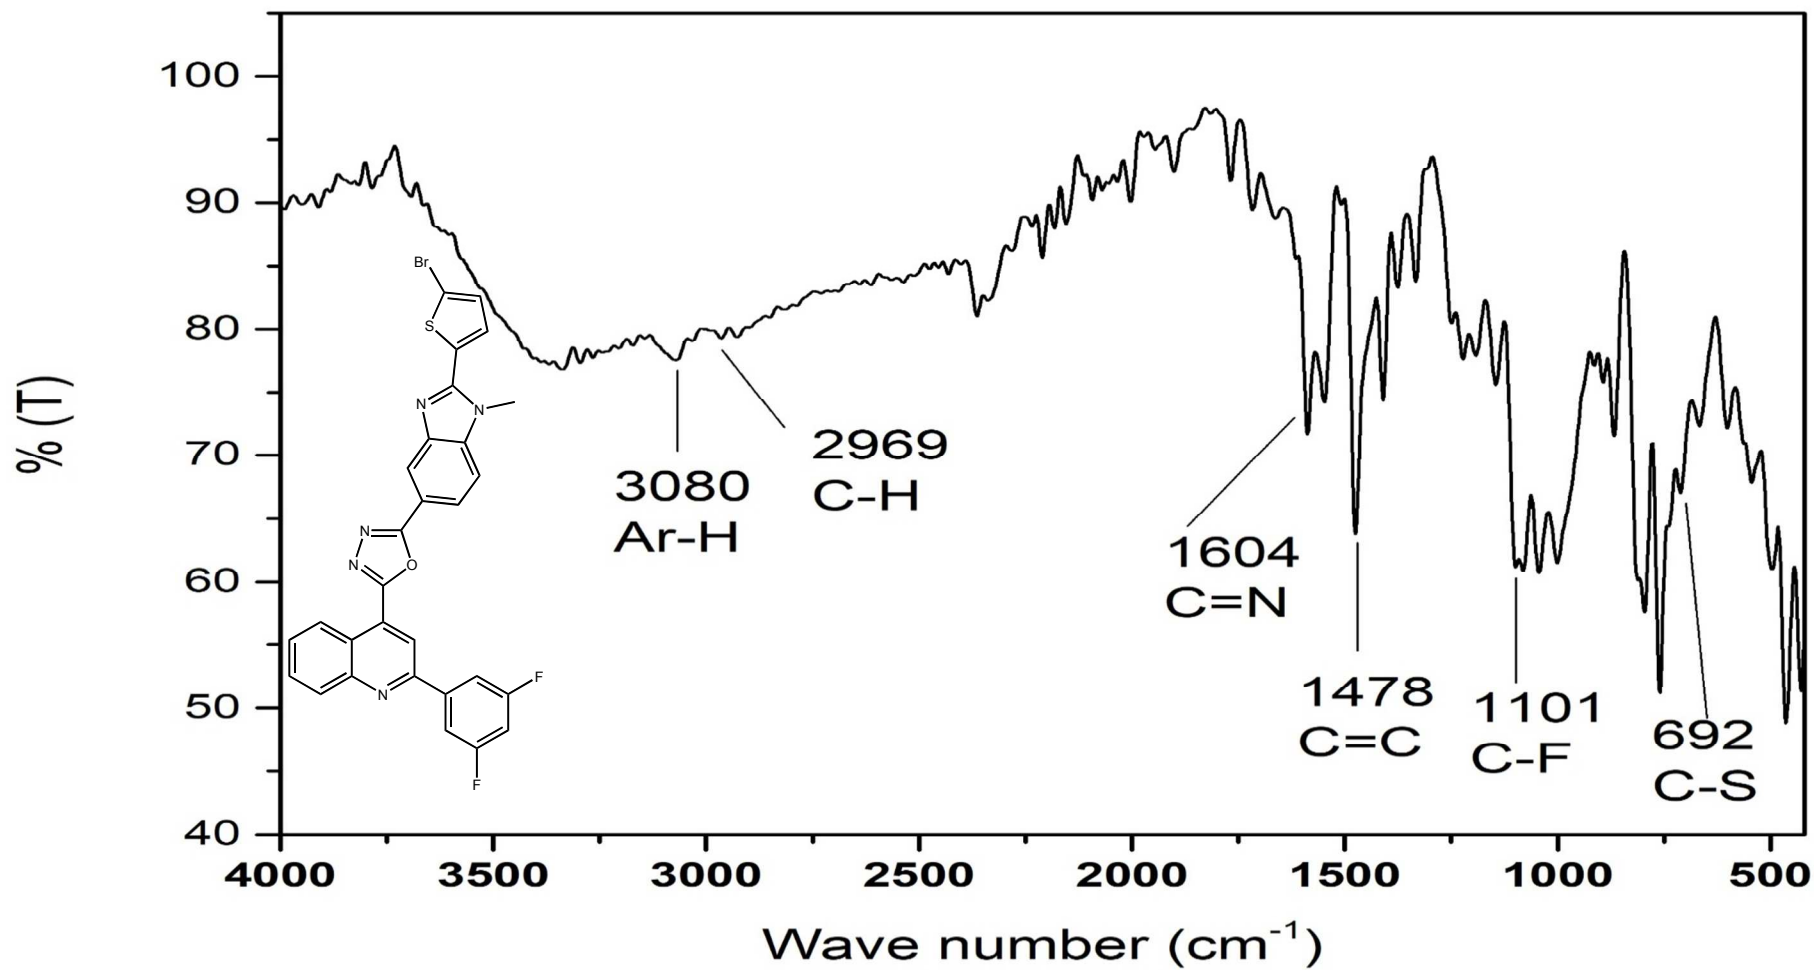

Figure S2: IR spectrum of compound 2-(2-(5-bromothiophen-2-yl)-1-methyl-1H-benzo[d]imidazol-5-yl)-5-(2-(2,4-dichlorophenyl)quinolin-4-yl)-1,3,4-oxadiazole (8a)

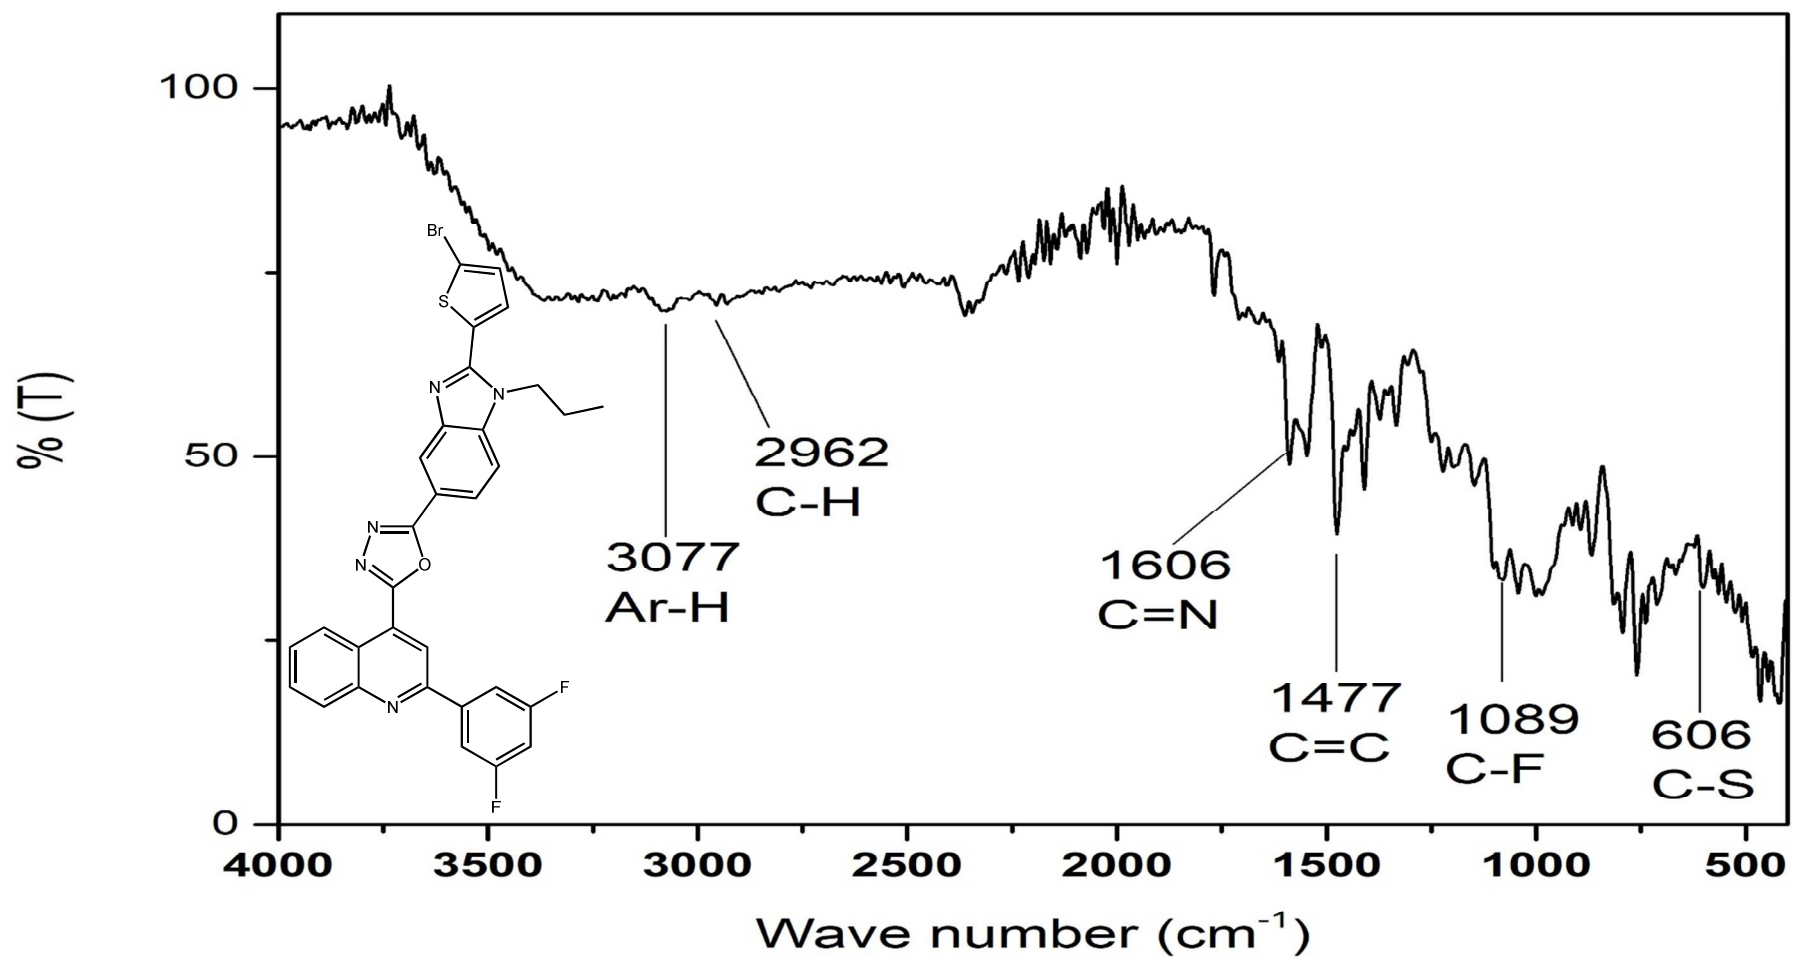

Figure S3: IR spectrum of compound 2-(2-(5-bromothiophen-2-yl)-1-propyl-1H-benzo[d]imidazol-5-yl)-5-(2-(3,5-difluorophenyl)quinolin-4-yl)-1,3,4-oxadiazole (8b)

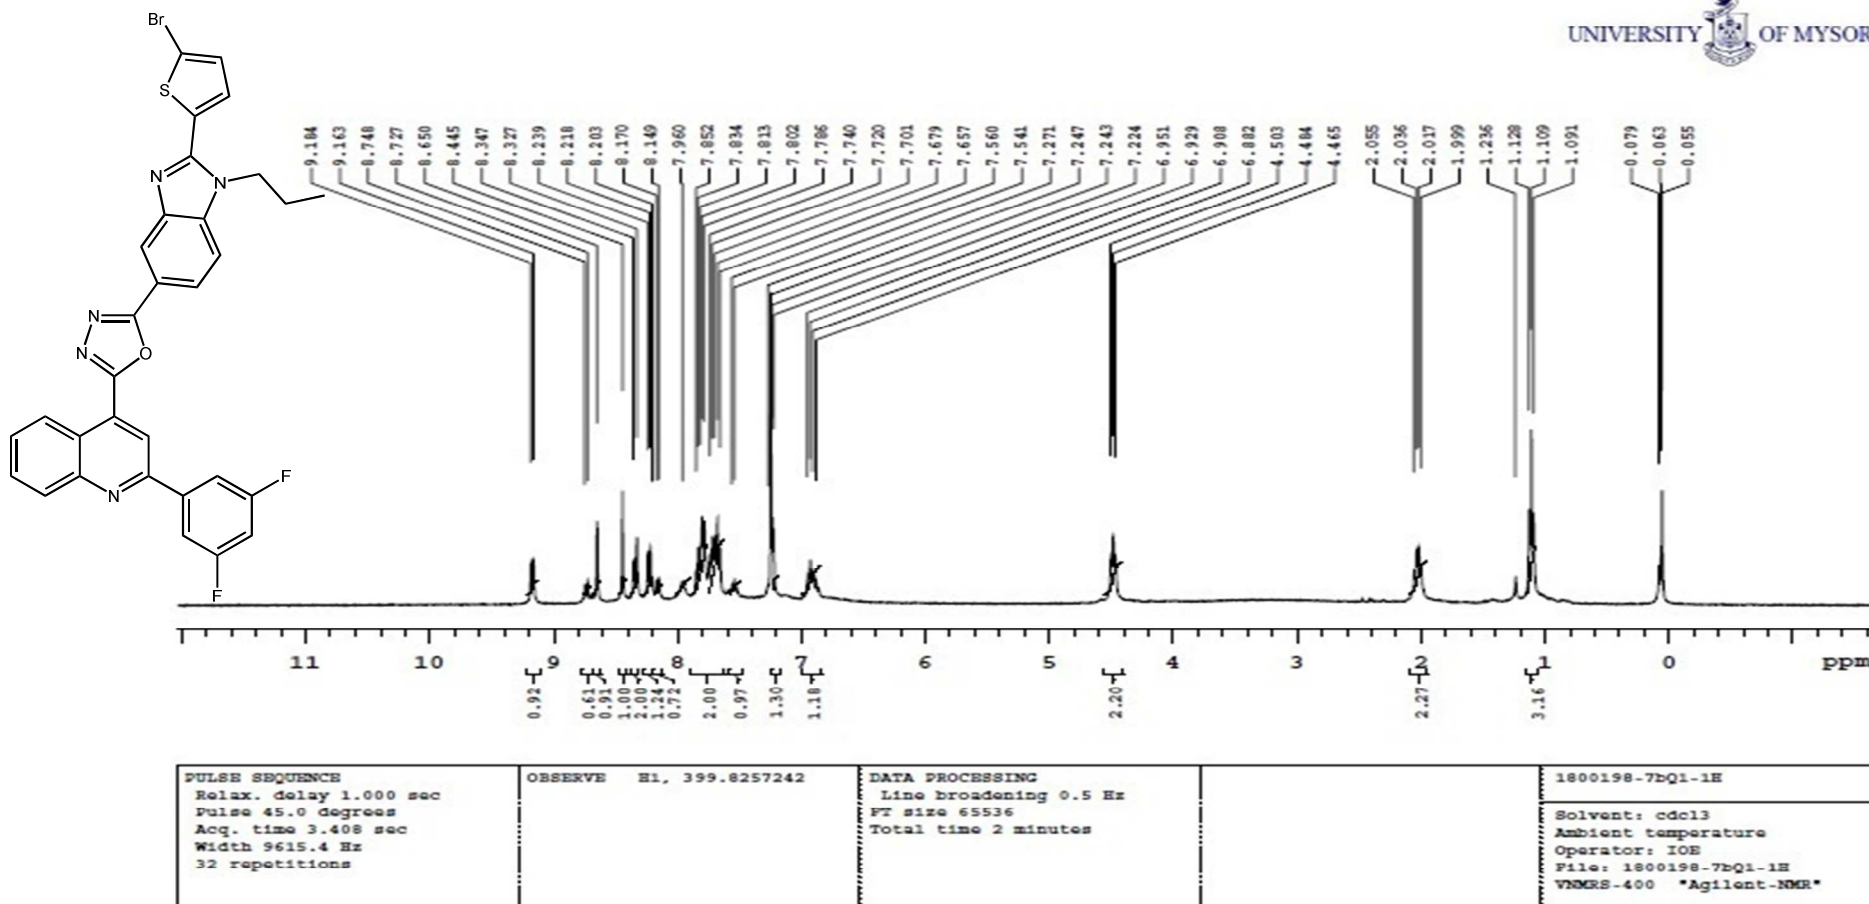

Figure S4: <sup>1</sup>H NMR of compound 2-(2-(5-bromothiophen-2-yl)-1-propyl-1H-benzo[d]imidazol-5-yl)-5-(2-(3,5-difluorophenyl)quinolin-4-yl)-1,3,4-oxadiazole (8b)



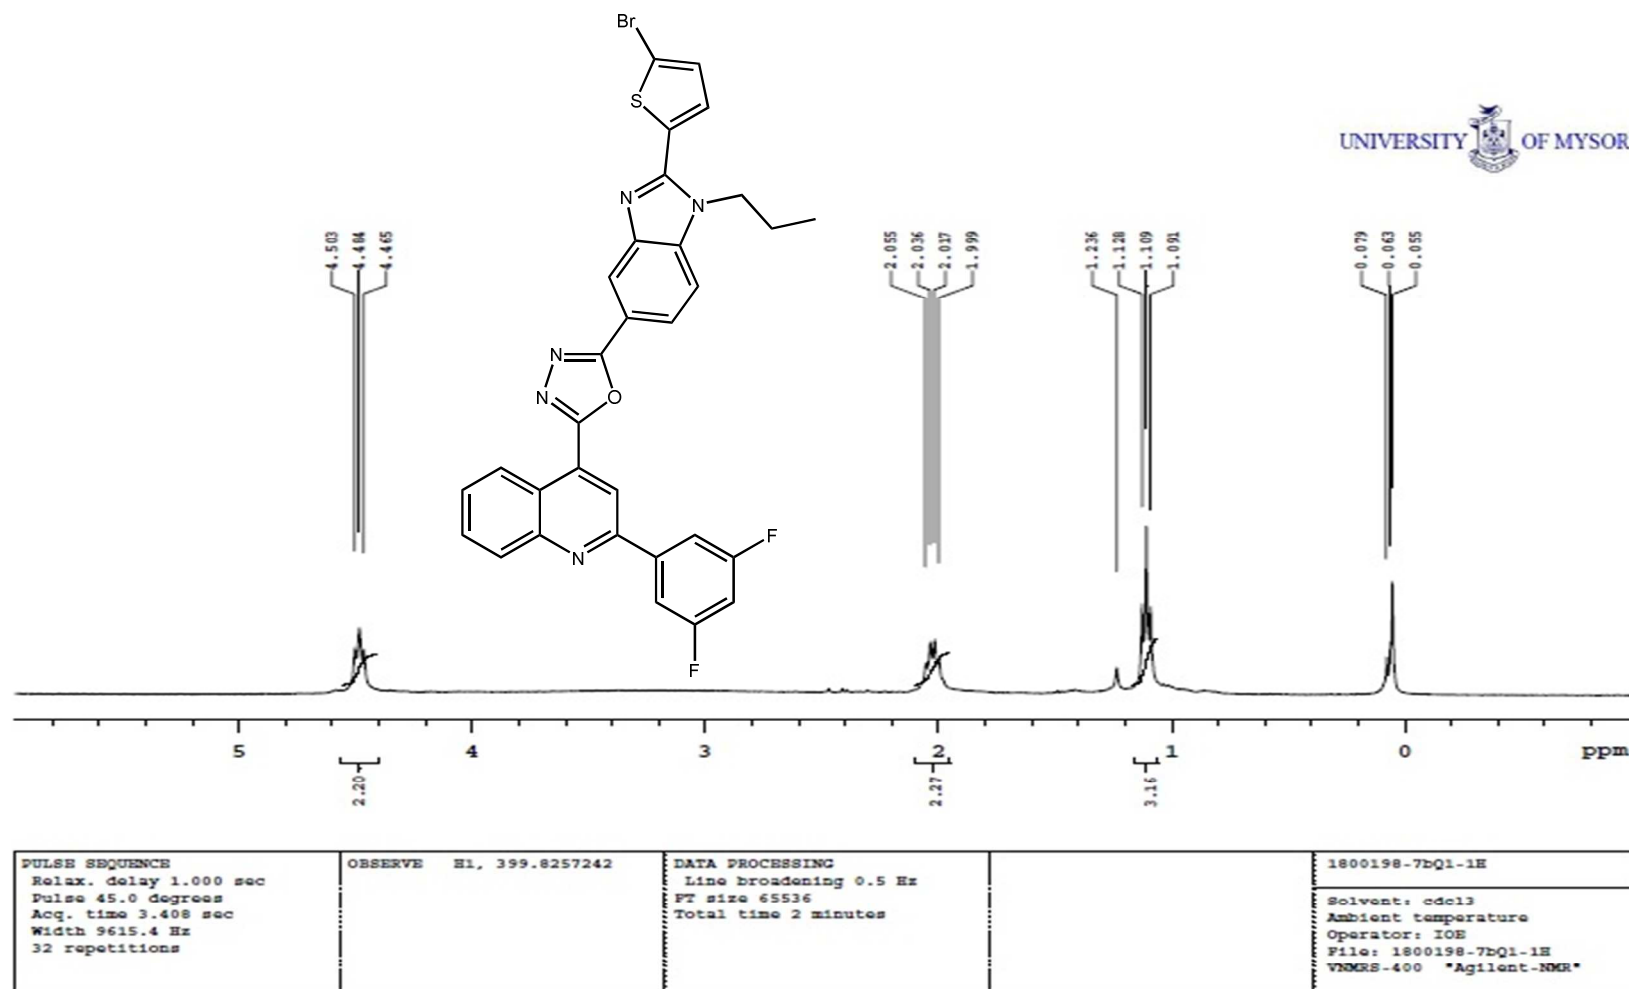

Figure S5: Expanded <sup>1</sup>H NMR of compound 2-(2-(5-bromothiophen-2-yl)-1-propyl-1H-benzo[d]imidazol-5-yl)-5-(2-(3,5-difluorophenyl)quinolin-4-yl)-1,3,4-oxadiazole (8b)

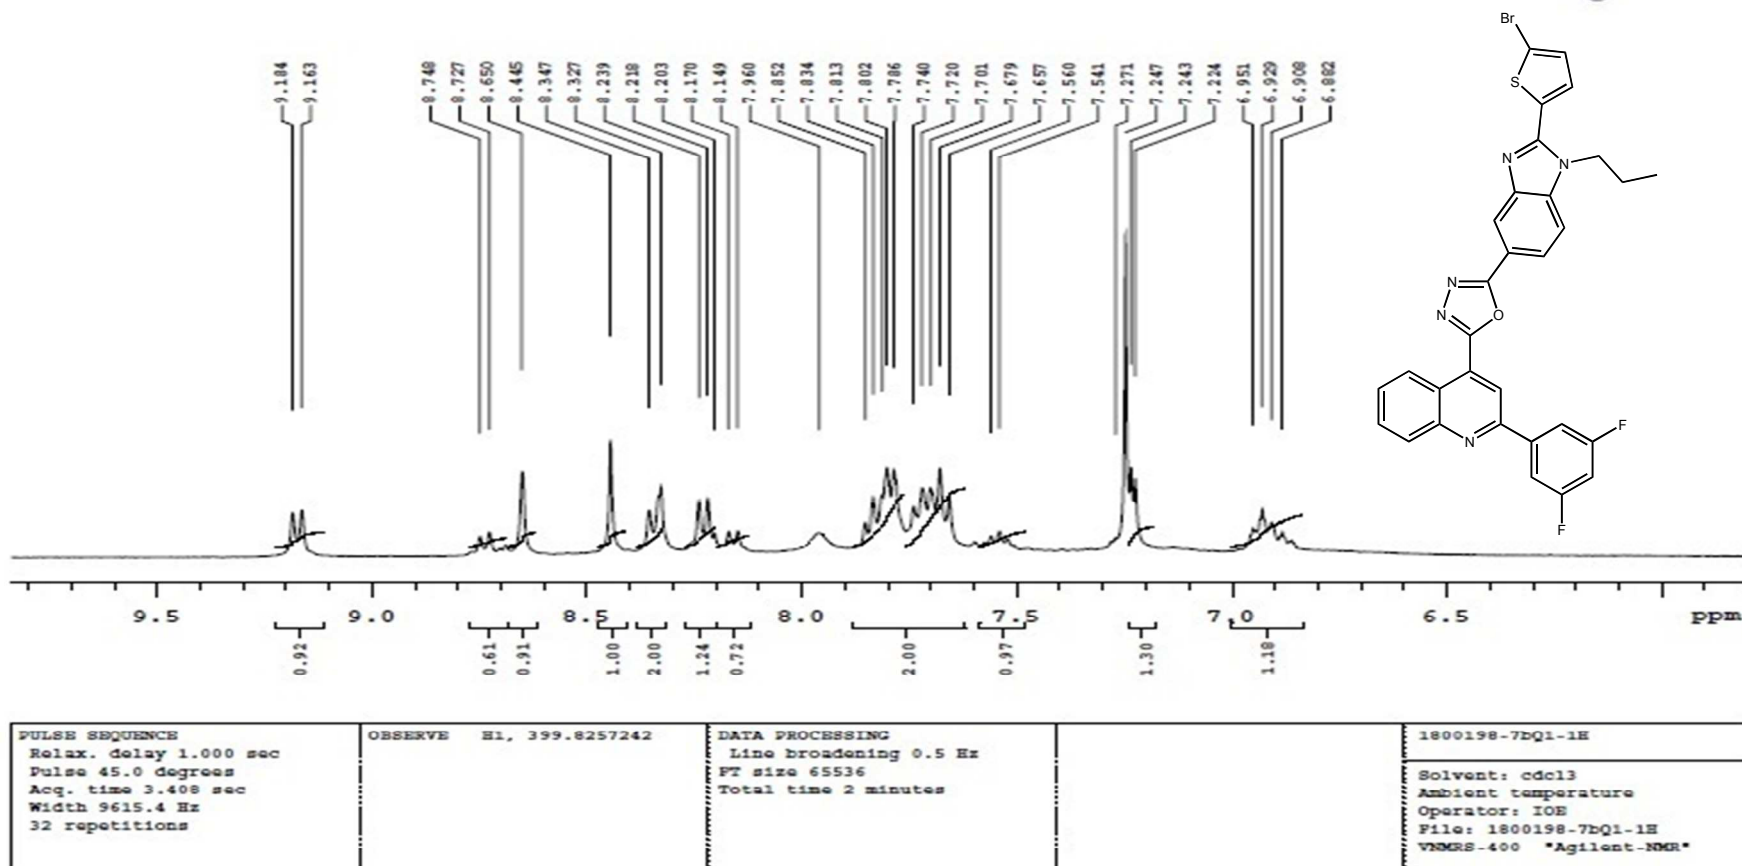

Figure S6: Expanded <sup>1</sup>H NMR of compound 2-(2-(5-bromothiophen-2-yl)-1-propyl-1H-benzo[d]imidazol-5-yl)-5-(2-(3,5-difluorophenyl)quinolin-4-yl)-1,3,4-oxadiazole (8b)

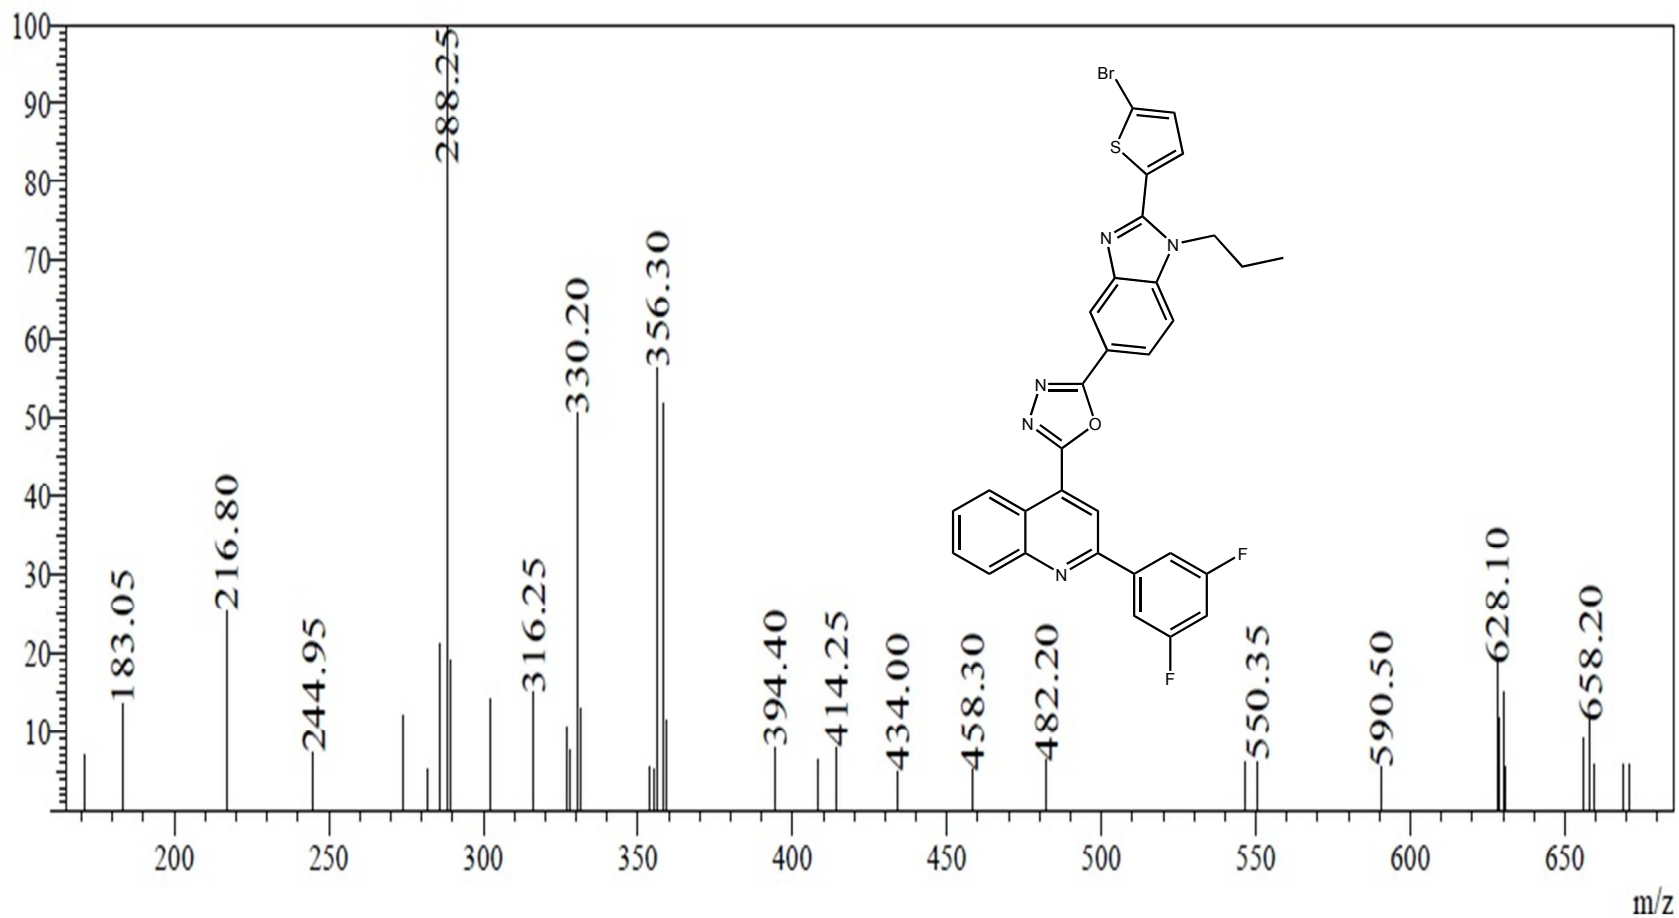

**Figure S7: LCMS spectrum of compound 2-(2-(5-bromothiophen-2-yl)-1-propyl-1H-benzo[d]imidazol-5-yl)-5-(2-(3,5-difluorophenyl)quinolin-4-yl)-1,3,4-oxadiazole (8b)**

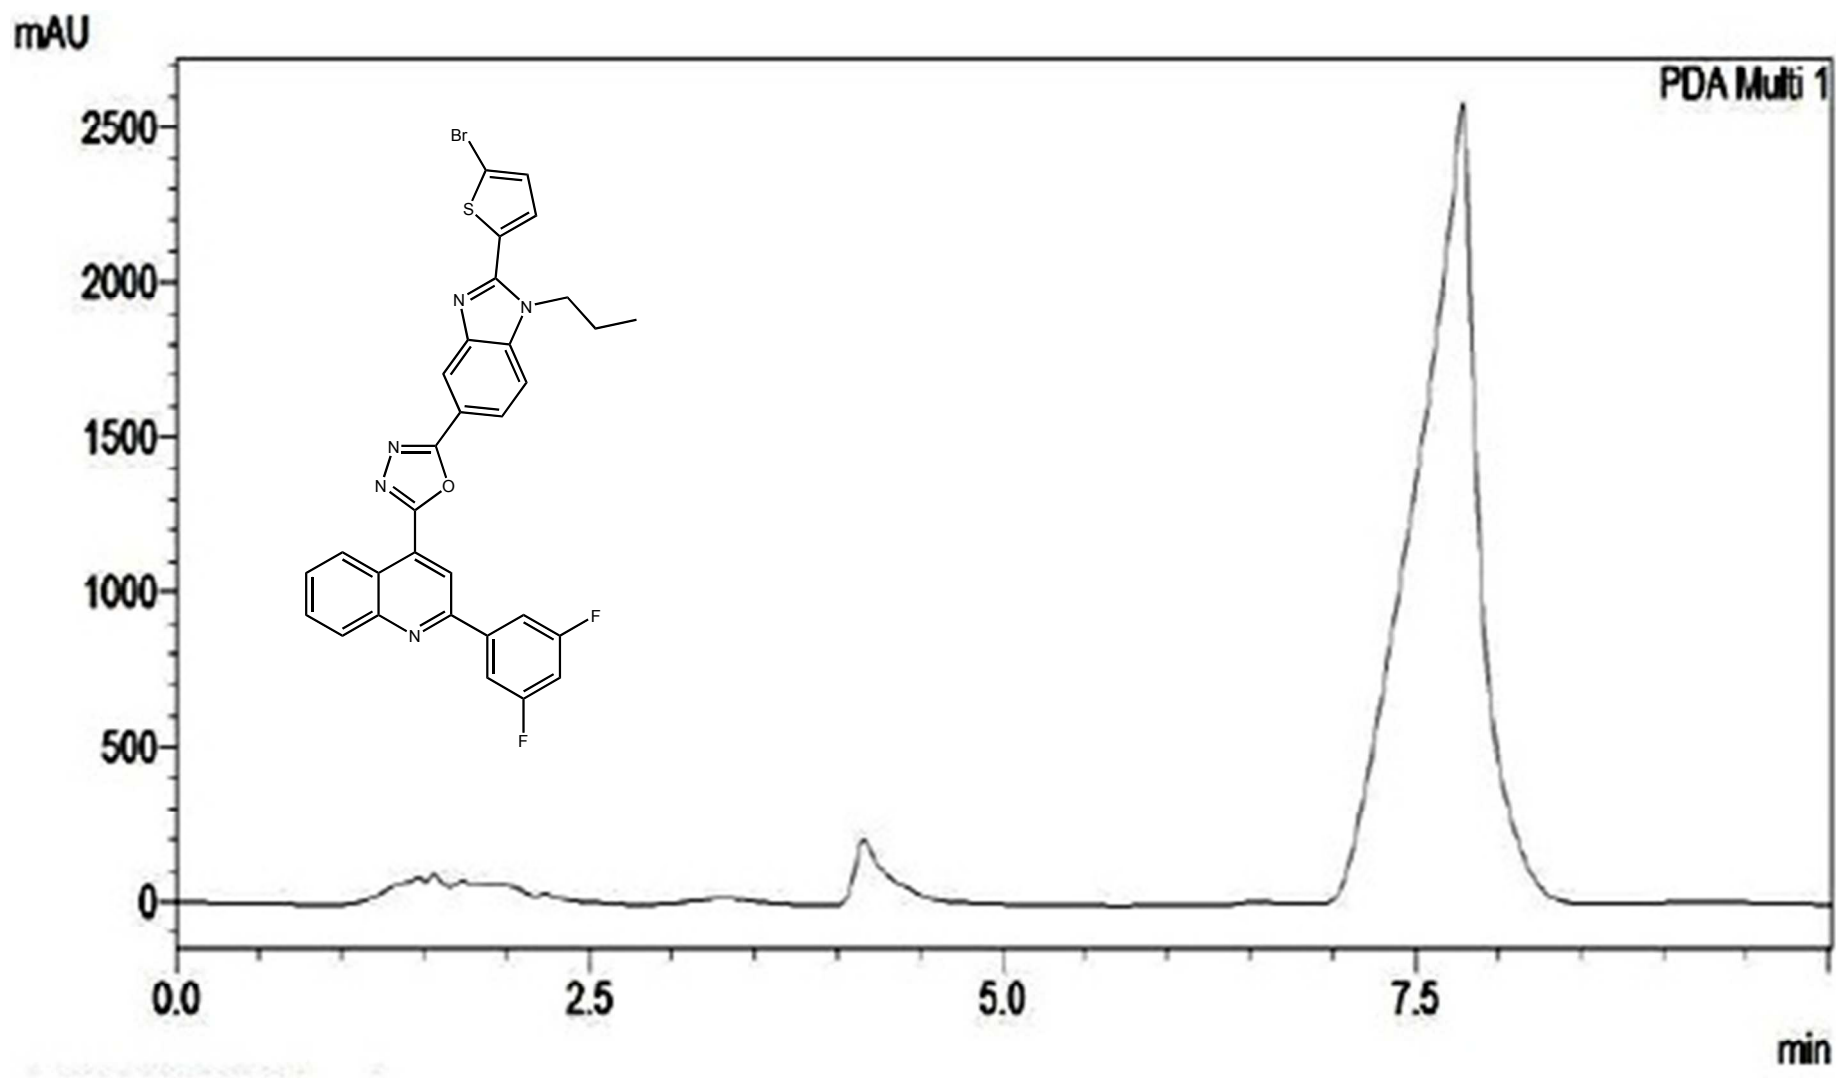

Figure S8: RP-HPLC-spectrum of compound 2-(2-(5-bromothiophen-2-yl)-1-propyl-1H-benzo[d]imidazol-5-yl)-5-(2-(3,5-difluorophenyl)quinolin-4-yl)-1,3,4-oxadiazole (8b)

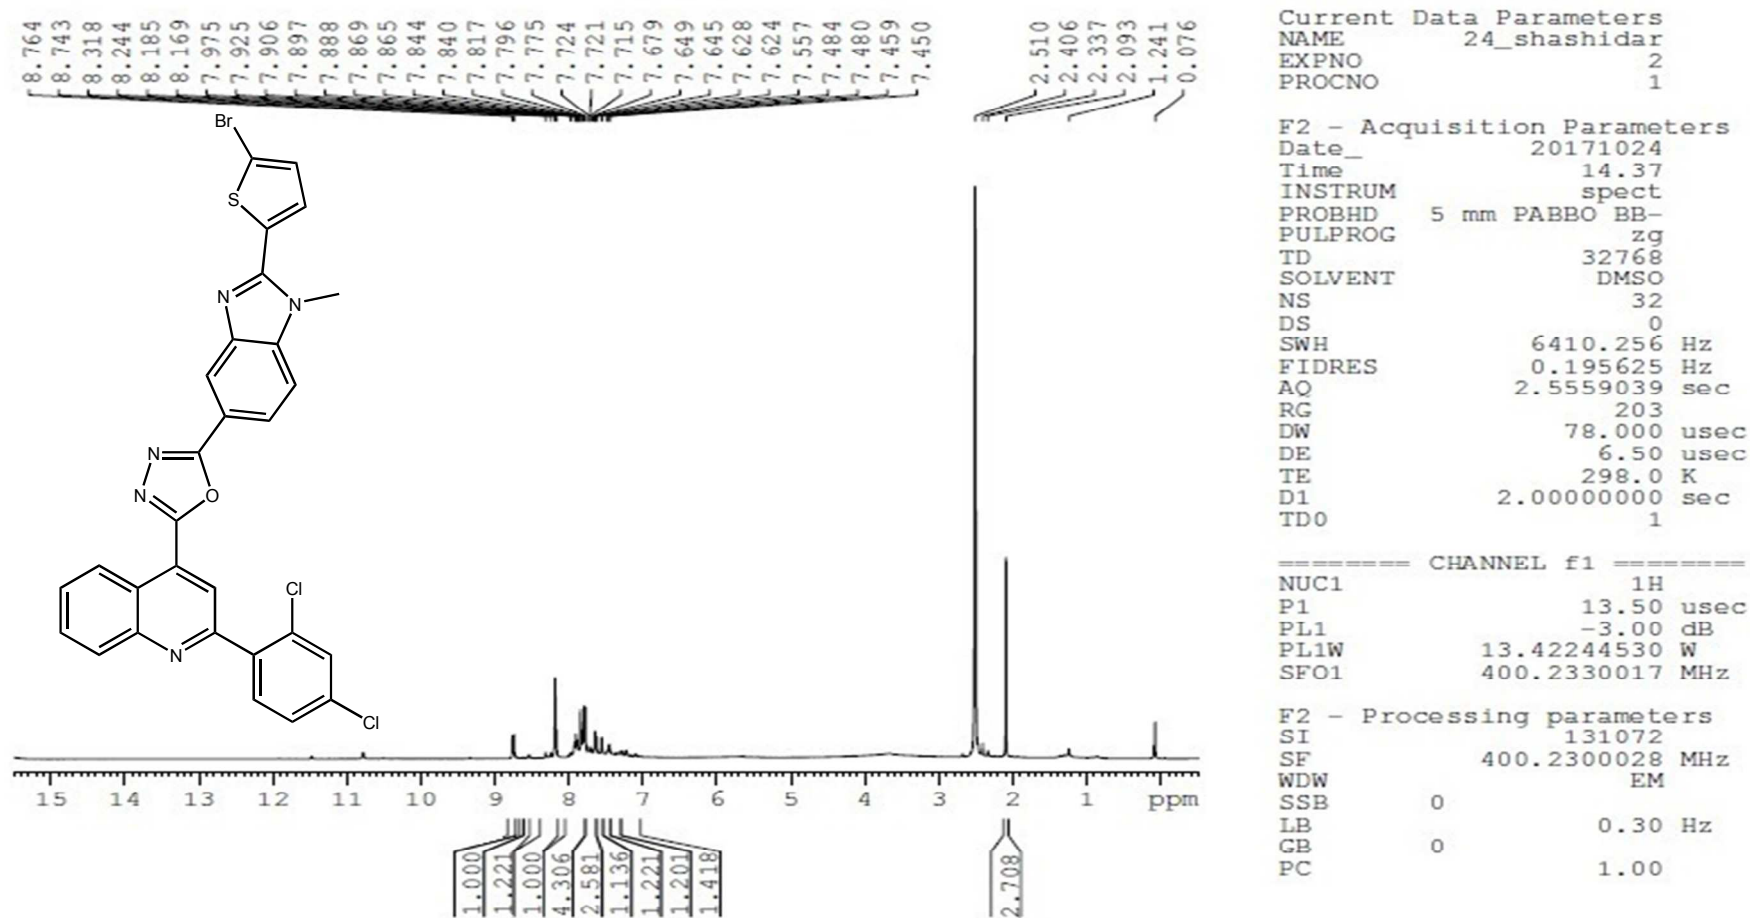

Figure S9:  $^1\text{H}$  NMR of compound 2-(2-(5-bromothiophen-2-yl)-1-methyl-1H-benzo[d]imidazol-5-yl)-5-(2-(2,4-dichlorophenyl)quinolin-4-yl)-1,3,4-oxadiazole (8d)

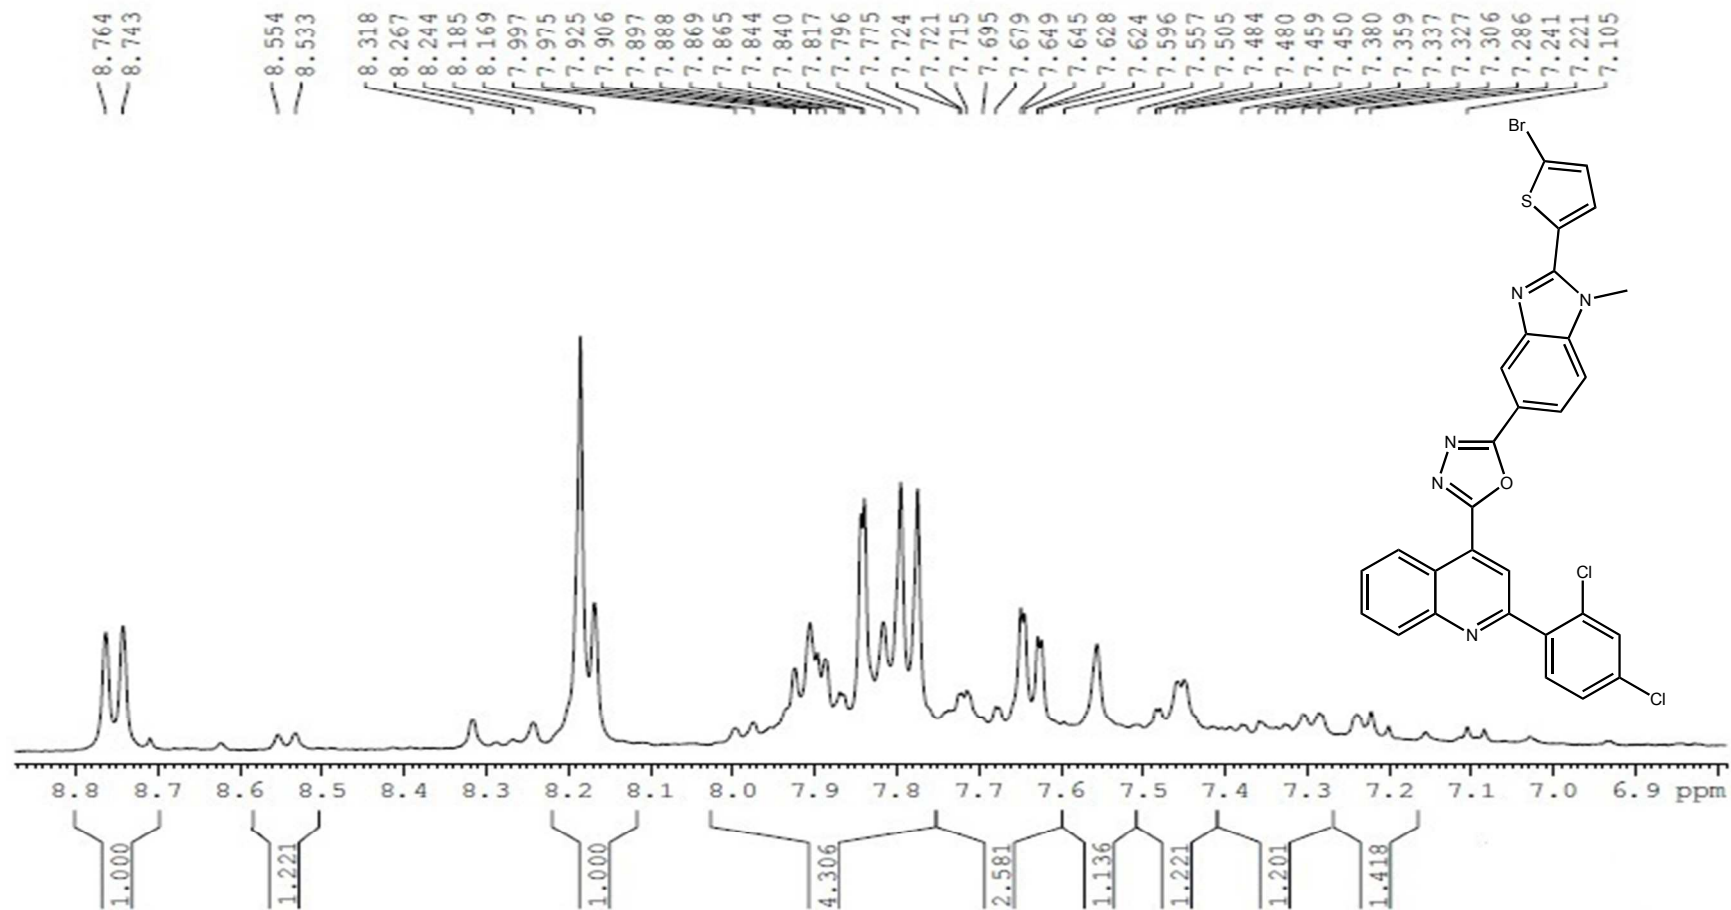

**Figure S10: Expanded  $^1\text{H}$  NMR of compound 2-(2-(5-bromothiophen-2-yl)-1-methyl-1H-benzo[d]imidazol-5-yl)-5-(2-(2,4-dichlorophenyl)quinolin-4-yl)-1,3,4-oxadiazole (8d)**

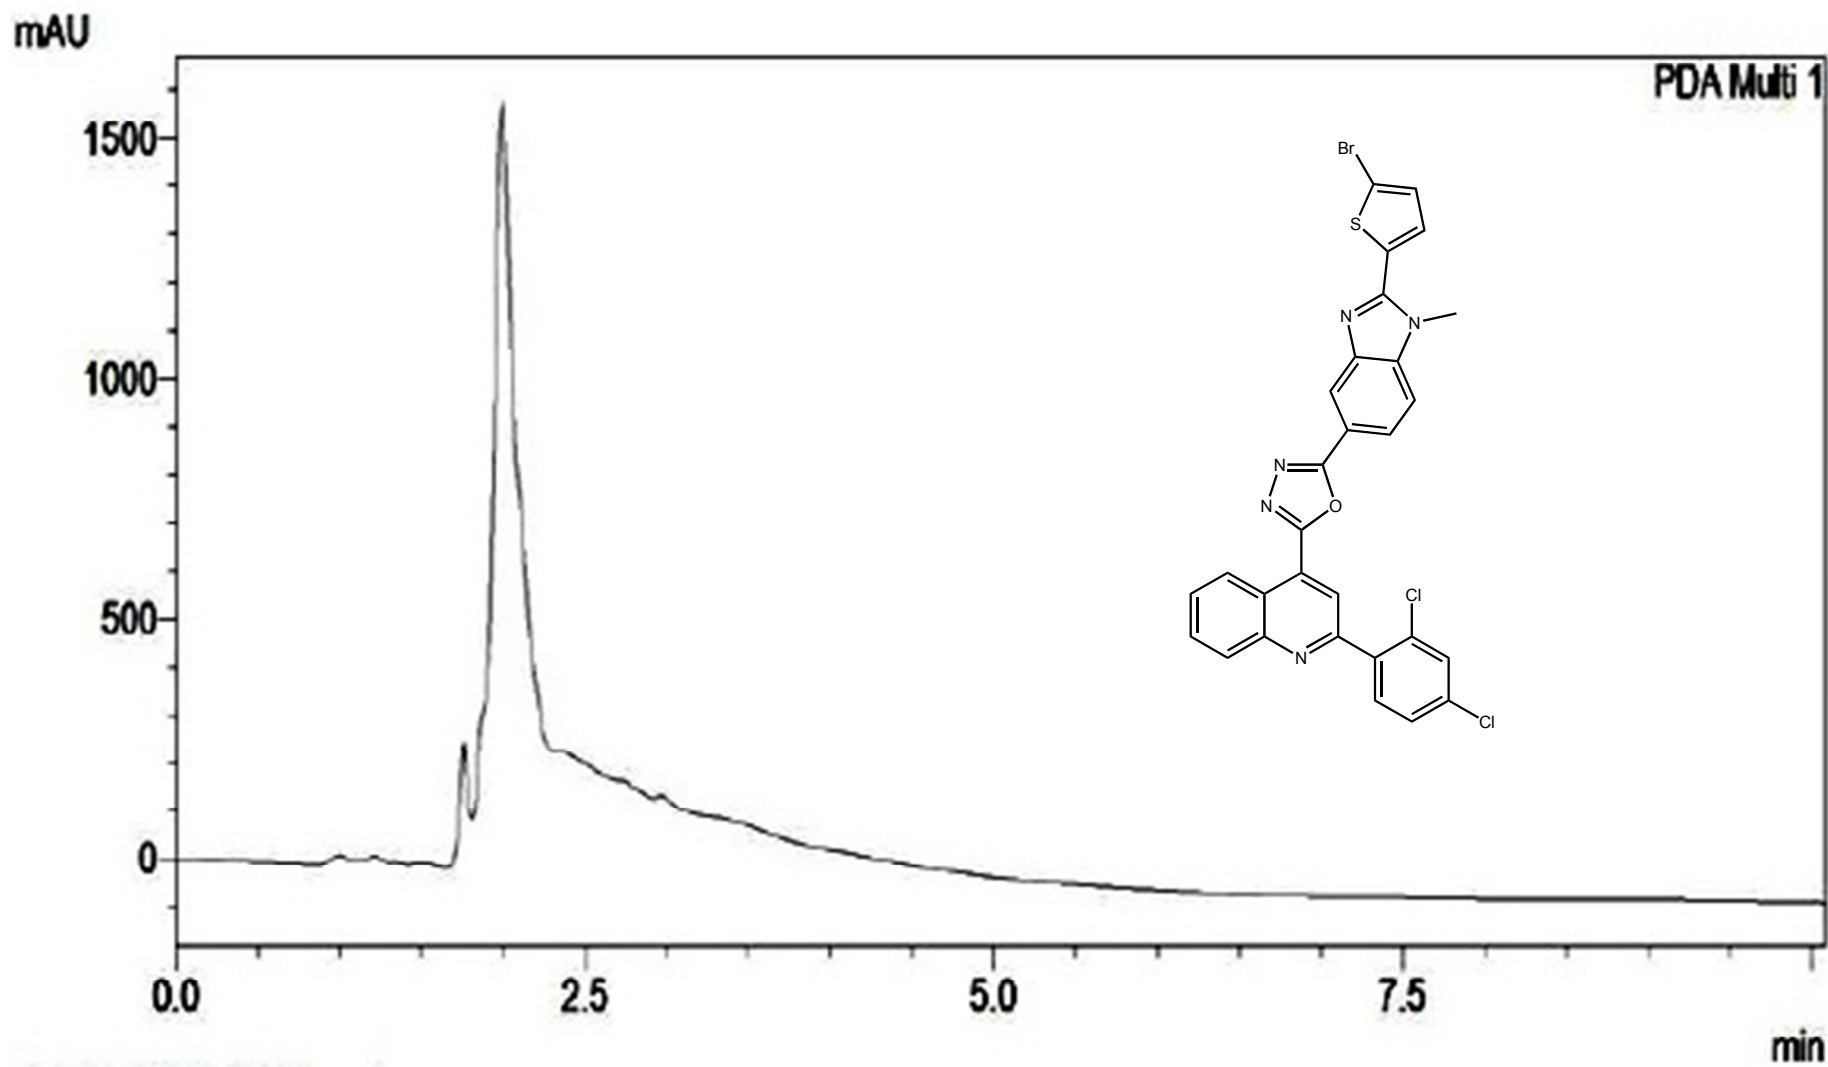

Figure S11: RP-HPLC of compound 2-(2-(5-bromothiophen-2-yl)-1-methyl-1H-benzo[d]imidazol-5-yl)-5-(2-(2,4-dichlorophenyl)quinolin-4-yl)-1,3,4-oxadiazole (8d)
